# Supplementary material for: Orthogonal Experimental Studies on Preparation of Mine‐Filling Materials from Carbide Slag, Granulated Blast‐Furnace Slag, Fly Ash, and Flue‐Gas Desulphurisation Gypsum
Source: Hindawi journal article supplement (doi:10.1155/2018/4173520), 2018-01-01
Supplement: f1 [file 4173520.f1.docx]

**Orthogonal experimental studies on preparation of mine-filling materials from carbide slag,** **granulated blast-furnace slag, fly ash, and flue-gas desulphurisation gypsum**

**Mingyue Wu1, Xiangming Hu1, Qian Zhang1, Weimin Cheng1, Zunxiang Hu1**

1Key Lab of Mine Disaster Prevention and Control, College of Mining and Safety Engineering, Shandong University of Science and Technology, Qingdao, 266590, China

Correspondence should be addressed to Xiangming Hu; [xiangming0727@163.com](mailto:xiangming0727@163.com)

Table S1. Range analysis of the water amount required for reaching standard consistency and consistency

| Factors | | A FGD gypsum | B GBFS | C Carbide slag |
| --- | --- | --- | --- | --- |
| Water required for reaching standard consistency | K1 | 44.6 | 44.0 | 40.0 |
| K2 | 45.2 | 50.6 | 42.8 |
| K3 | 41.4 | 42.6 | 43.8 |
| K4 | 39.4 | 41.4 | 49.6 |
| K5 | 52.4 | 44.4 | 46.8 |
| R | 13.0 | 9.2 | 9.6 |
| Consistency | K1 | 14 | 13 | 13 |
| K2 | 14 | 12 | 12 |
| K3 | 13 | 13 | 12 |
| K4 | 13 | 13 | 12 |
| K5 | 9 | 13 | 14 |
| R | 5 | 1 | 2 |

Table S1 shows the influence of different factors (FGD gypsum、GBFS and Carbide slag) at different levels on the water required for reaching standard consistency and consistency of cementitious materials by calculating rang value.

Table S2. Range analysis of the setting time

| Factors | | A FGD gypsum | B GBFS | C Carbide slag |
| --- | --- | --- | --- | --- |
| Initial setting time | K1 | 279.2 | 263.2 | 266.8 |
| K2 | 268.4 | 265.8 | 262.0 |
| K3 | 265.2 | 267.6 | 266.4 |
| K4 | 260.0 | 268.4 | 270.4 |
| K5 | 270.4 | 278.2 | 277.6 |
| R | 19.2 | 15.0 | 15.6 |
| Final setting time | K1 | 386.8 | 372.4 | 370.6 |
| K2 | 373.4 | 377.2 | 370.6 |
| K3 | 379.8 | 373.4 | 379.4 |
| K4 | 363.2 | 370.6 | 374.4 |
| K5 | 370.0 | 377.4 | 378.2 |
| R | 23.6 | 6.8 | 8.8 |

Table S2 shows the influence of different factors (FGD gypsum、GBFS and Carbide slag) at different levels on the initial setting time and final setting time of cementitious materials by calculating rang value.

Table S3. Range analysis of the slump value

| Factors | | A FGD gypsum | B GBFS | C Carbide slag |
| --- | --- | --- | --- | --- |
| Slump value | K1 | 159 | 180 | 166 |
| K2 | 162 | 177 | 143 |
| K3 | 158 | 144 | 155 |
| K4 | 173 | 145 | 172 |
| K5 | 157 | 162 | 172 |
| R | 16 | 36 | 29 |

Table S3 shows the influence of different factors (FGD gypsum、GBFS and Carbide slag) at different levels on the slump of cementitious materials by calculating rang value.

Table S4. Range analysis of the material strength

| Factors | | | A FGD gypsum | B GBFS | C Carbide slag |
| --- | --- | --- | --- | --- | --- |
| The strength of 7d | Compressive strength | K1 | 1.986 | 1.856 | 1.878 |
| K2 | 2.256 | 1.914 | 1.892 |
| K3 | 1.932 | 2.03 | 2.054 |
| K4 | 1.912 | 1.854 | 1.918 |
| K5 | 1.71 | 2.142 | 2.054 |
| R | 0.546 | 0.288 | 0.176 |
| Flexural strength | K1 | 0.73 | 0.69 | 0.696 |
| K2 | 0.882 | 0.736 | 0.718 |
| K3 | 0.77 | 0.778 | 0.794 |
| K4 | 0.736 | 0.722 | 0.74 |
| K5 | 0.62 | 0.812 | 0.79 |
| R | 0.262 | 0.122 | 0.098 |
| The strength of 28d | Compressive strength | K1 | 3.49 | 3.482 | 3.554 |
| K2 | 3.362 | 3.398 | 3.462 |
| K3 | 3.31 | 3.63 | 3.492 |
| K4 | 3.714 | 3.424 | 3.482 |
| K5 | 3.636 | 3.578 | 3.522 |
| R | 0.404 | 0.232 | 0.092 |
| Flexural strength | K1 | 1.166 | 1.262 | 1.216 |
| K2 | 1.3 | 1.206 | 1.152 |
| K3 | 1.168 | 1.264 | 1.24 |
| K4 | 1.256 | 1.116 | 1.222 |
| K5 | 1.216 | 1.258 | 1.276 |
| R | 0.134 | 0.148 | 0.124 |

Table S4 shows the influence of different factors (FGD gypsum、GBFS and Carbide slag) at different levels on the 7-d and 28-d strength of cementitious materials by calculating rang value.
